# **ShinyLearner: A containerized benchmarking tool for machine-learning classification of tabular data**

Stephen R. Piccolo<sup>1,\*</sup>, Terry J. Lee<sup>1</sup>, Erica Suh<sup>1</sup>, Kimball Hill<sup>1</sup>

1 - Department of Biology, Brigham Young University, Provo, UT, USA

\* - Please address correspondence to S.R.P. at [stephen\\_piccolo@byu.edu](mailto:stephen_piccolo@byu.edu).

## 1 **Abstract**

2 Classification algorithms assign observations to groups based on patterns in data. The machine-learning  
3 community have developed myriad classification algorithms, which are employed in diverse life-science  
4 research domains. When applying such algorithms, researchers face the challenge of deciding which  
5 algorithm(s) to apply in a given research domain. Algorithm choice can affect classification accuracy  
6 dramatically, so it is crucial that researchers optimize these choices based on empirical evidence rather than  
7 hearsay or anecdotal experience. In benchmark studies, multiple algorithms are applied to multiple datasets,  
8 and the researcher examines overall trends. In addition, the researcher may evaluate multiple hyperparameter  
9 combinations for each algorithm and use feature selection to reduce data dimensionality. Although software  
10 implementations of classification algorithms are widely available, robust benchmark comparisons are difficult  
11 to perform when researchers wish to compare algorithms that span multiple software packages.

12 Programming interfaces, data formats, and evaluation procedures differ across software packages; and  
13 dependency conflicts may arise during installation. To address these challenges, we created ShinyLearner, an  
14 open-source project for integrating machine-learning packages into software containers. ShinyLearner  
15 provides a uniform interface for performing classification, irrespective of the library that implements each  
16 algorithm, thus facilitating benchmark comparisons. In addition, ShinyLearner enables researchers to  
17 optimize hyperparameters and select features via nested cross validation; it tracks all nested operations and  
18 generates output files that make these steps transparent. ShinyLearner includes a Web interface to help users  
19 more easily construct the commands necessary to perform benchmark comparisons. ShinyLearner is freely  
20 available at <https://github.com/srp33/ShinyLearner>.

21 **Keywords:** Machine learning, supervised learning, classification, software containers, benchmark, feature  
22 selection, algorithm optimization, model selection

## 23 **Background**

24 Classification falls under the category of supervised learning, a branch of machine learning. When  
25 performing classification, researchers seek to assign observations to distinct groups. For example, medical  
26 researchers use classification algorithms to identify patterns that predict whether patients have a particular  
27 disease, will respond positively to a particular treatment, or will survive a relatively long period of time after  
28 diagnosis[1–11]. Applications in molecular biology include annotating DNA sequencing elements,  
29 identifying gene structures, and predicting protein secondary structures[12].

30 Typically, a classification algorithm is “trained” on a dataset that contains samples (observations) from two or  
31 more groups, and the algorithm identifies patterns that differ among the groups. If these patterns are reliable  
32 indicators of group membership, the algorithm will be able to accurately assign new samples to these groups  
33 and thus may be suitable for broader application. Different research applications require different levels of  
34 accuracy before classification algorithms are suitable for broader application. However, even small  
35 improvements in accuracy can provide large benefits. For example, if an algorithm predicts drug-treatment  
36 responses for 1000 patients and attains accuracy levels that are 2% higher than a baseline method, this  
37 algorithm would benefit 20 additional patients. Accordingly, a key focus of classification research in the life  
38 sciences is to identify generalizable ways to optimize prediction accuracy.

39 The machine-learning community have developed hundreds of classification algorithms and have  
40 incorporated many of these implementations into open-source software packages[13–18]. Each algorithm has  
41 different properties, which affect its suitability for particular applications. In addition, most algorithms  
42 support hyperparameters, which alter the algorithms’ behavior and can affect the algorithms’ accuracy  
43 dramatically. In addition, feature-selection (or feature-ranking) algorithms can be used in complement to  
44 classification algorithms, helping to identify combinations of variables that are most predictive of group  
45 membership and aiding in data interpretation[19,20]. With this abundance of options to consider, researchers  
46 face the challenge of identifying which algorithm(s), hyperparameter combinations, and features are optimal  
47 for a particular dataset.

48 To improve the odds of making successful predictions, researchers should choose algorithms,  
49 hyperparameters, and features based on empirical evidence rather than hearsay or anecdotal experience. Prior  
50 studies can provide insight into algorithm performance, but few studies evaluate algorithms comprehensively,  
51 and performance may vary widely for different types of data. One way to select these options empirically is  
52 via nested cross-validation[21]. With this approach, a researcher divides a single dataset into training and

53 validation sets. Within each training set, the researcher divides the data further into training and validation  
54 subsets and then evaluates various options using these subsets. The top-performing option(s) are then used  
55 when making predictions on the outer validation set. Alternatively, a researcher might perform a benchmark  
56 study, applying (non-nested) cross validation to multiple datasets from a given research domain. After testing  
57 multiple algorithms, hyperparameters, and/or feature subsets, the researcher can examine overall trends and  
58 identify options that tend to perform well[22,23]. With either approach, it is ideal to evaluate a  
59 comprehensive set of options. However, several challenges make it difficult to perform such evaluations  
60 effectively:

- 61 • Researchers may wish to compare algorithms that have been implemented in different software  
62 packages. Although many machine-learning packages allow users to execute algorithms  
63 programmatically, application programming interfaces (APIs) are not standardized, and they are  
64 implemented in diverse programming languages.
- 65 • Different software implementations use different techniques for evaluating algorithm performance, so  
66 it is difficult to ensure that comparisons are consistent.
- 67 • Input and output formats differ by software implementation, thus requiring custom efforts to prepare  
68 data and interpret results.
- 69 • When installing the software, researchers typically must install a series of software dependencies.  
70 Installation requirements often differ by operating system, and versioning conflicts can arise[24].

71 To reduce these barriers, we created ShinyLearner. For this open-source project, we have integrated existing  
72 machine-learning packages into containers, which provide a consistent interface for performing benchmark  
73 comparisons of classification algorithms. ShinyLearner can be installed on Linux, Mac, or Windows  
74 operating systems, with no need to install software dependencies other than the Docker containerization  
75 software. ShinyLearner currently supports 53 classification algorithms and 1300+ hyperparameter  
76 combinations across these algorithms; users can perform automatic hyperparameter tuning via nested cross  
77 validation. In addition, ShinyLearner supports 16 feature-selection algorithms, enabling researchers to reduce  
78 data dimensionality before performing classification (via nested cross validation). New algorithms can be  
79 integrated in an extensible manner.

80 ShinyLearner is designed to be friendly to non-computational scientists—no programming is required. We  
81 provide a Web-based tool (<http://bioapps.byu.edu/shinylearner>) to guide users through the process of creating  
82 the Docker commands necessary to execute the software. ShinyLearner supports a variety of input formats  
83 and produces output files in “tidy data” format[25], thus making it easy to import results into external tools.

84 Even though other machine-learning packages support nested cross validation, these evaluations may occur  
85 in a “black box.” ShinyLearner tracks all nested operations and generates output files that make this process  
86 transparent.

87 Below we describe ShinyLearner in more detail and illustrate its use via benchmark evaluations. We evaluate  
88 10 classification algorithms and 10 feature-selection algorithms on 10 biomedical datasets. In addition, we  
89 assess the effects of hyperparameter optimization on predictive performance, provide insights on model  
90 interpretability, and consider practical elements of performing benchmark comparisons.

## 91 **Methods**

92 ShinyLearner encapsulates open-source, machine-learning packages into Docker images[26], which are  
93 available on Docker Hub (<https://hub.docker.com/r/srp33/shinylearner/>). Currently, ShinyLearner supports  
94 algorithms from scikit-learn, Weka, mlr, h2o, and Keras (with a TensorFlow backend)[13–15,27–29]. To  
95 facilitate user interaction, to harmonize execution across the tools, and to evaluate predictive performance,  
96 ShinyLearner uses shell scripts, Python scripts, R scripts, and Java code[30–32]; these are included in the  
97 Docker images. To perform an analysis, the user executes a shell command, specifying arguments to indicate  
98 the location(s) of the input files, which algorithms to use, whether to perform Monte Carlo or k-fold cross  
99 validation, etc. The analysis is executed within a container, and output files are saved to a directory that the  
100 user specifies. TensorFlow provides support for execution on graphical processing units, which requires a  
101 slightly different software configuration, so we provide a separate Docker image that enables this feature  
102 ([https://hub.docker.com/r/srp33/shinylearner\\_gpu/](https://hub.docker.com/r/srp33/shinylearner_gpu/)). All changes to the ShinyLearner code are tested via  
103 continuous integration[33]; build status can be viewed at <https://travis-ci.org/srp33/ShinyLearner>.

104 Figure S1 shows an example ShinyLearner command that a user might execute. For convenience, and to help  
105 users who have limited experience with Docker or the command line, we created a Web-based user interface  
106 where users can specify local data paths, choose algorithms from a list, and select other settings  
107 (<https://bioapps.byu.edu/shinylearner>). After the user has made these selections, the Web interface generates  
108 a Docker command, which the user can copy and paste; Windows Command Line, Mac Terminal, and Linux  
109 Terminal commands are generated. We used the R Shiny framework to build this web application[34].

110 ShinyLearner interfaces with each third-party machine-learning package via shell scripts wrap that around  
111 the software’s API. For each algorithm, one shell script specifies the algorithm’s default hyperparameters. In  
112 most cases, additional shell scripts specify alternative hyperparameters. The classification algorithms in

113 ShinyLearner span methodological categories, including linear models, kernel-based techniques, tree-based  
114 approaches, Bayesian models, distance-based methods, ensemble approaches, and neural networks. In  
115 selecting algorithms to include, we focused primarily on implementations that can handle discrete and  
116 continuous data values, support multiple classes, and produce probabilistic predictions. For each algorithm,  
117 we reviewed documentation for the third-party software and identified a representative variety of  
118 hyperparameter options. Admittedly, these selections are somewhat arbitrary and inexhaustive. However,  
119 they can be extended with additional options. We excluded some algorithm implementations and  
120 hyperparameter combinations because errors occurred when we attempted to execute them or because they  
121 failed to achieve reasonable levels of classification accuracy on simulated data.

122 Additional algorithms (and hyperparameter combinations) can be incorporated into ShinyLearner. The sole  
123 requirements are that they have been implemented as free and open-source software and provide an API (that  
124 can be executed via Linux command-line scripts). Users who wish to extend ShinyLearner must:

- 125 1. Identify any software dependencies that the new algorithm requires. If those dependencies are not  
126 currently included in the ShinyLearner image, the user must modify the ShinyLearner Dockerfiles  
127 accordingly.
- 128 2. Create bash script(s) that accepts specific arguments and invoke the new algorithm.
- 129 3. Request that these changes be included in ShinyLearner via a GitHub pull request.

130 ShinyLearner supports the following input-data formats: tab-separated value (.tsv), comma-separated value  
131 (.csv), and attribute-relation file format (.arff). When tab-separated or comma-separated files are used,  
132 column names and row names must be specified; by default, rows must represent samples (observations) and  
133 columns must represent features (variables). However, transposed versions of these formats can be used  
134 (features as rows and samples as columns); in these cases, the user should use “.ttsv” or “.tcsv” as the file  
135 extension. ShinyLearner accepts files that have been compressed with the gzip algorithm (using “.gz” as the  
136 file extension). Users may specify more than one data file as input, after which ShinyLearner will identify  
137 sample identifiers that overlap among the files and merge on those identifiers. If the user specifies,  
138 ShinyLearner will scale numeric values, one-hot encode categorical variables[35], and impute missing values.

139 ShinyLearner supports two schemes for evaluating predictive performance: Monte Carlo cross validation and  
140 k-fold cross validation[36,37]. In Monte Carlo cross validation, the data are split randomly into a training and  
141 validation set; the algorithm is allowed to access the class labels for the training data only. Later the algorithm  
142 makes predictions for the validation samples, and the accuracy of those predictions is evaluated using various  
143 metrics. Typically, this process is repeated many times to derive confidence intervals for the accuracy metrics.

144 In k-fold cross validation, the process is similar, except that the data are partitioned into evenly sized groups  
145 and each group is used as a validation set through rounds of training and testing. When multiple algorithms  
146 or hyperparameter combinations are employed, ShinyLearner evaluates nested training and validation sets,  
147 with the goal of identifying the optimal combination for each algorithm. Then it uses these selections when  
148 making predictions on the outer validation set. Nested cross validation is also used for feature selection; a  
149 feature-selection algorithm ranks the features within each nested training set, and different quantities of  
150 top-ranked features are used to train the classification algorithm. The feature subsets that perform best are  
151 used in making the outer validation-set predictions. Hyperparameter optimization and feature selection may  
152 be combined; however, such analyses are highly computationally intensive for large benchmarks.

153 All outputs are stored in tab-delimited files, thus enabling users to import results directly into external  
154 analysis tools. ShinyLearner produces output files that contain the following information for each  
155 combination of algorithm, hyperparameters, and cross-validation iteration: 1) predictions for each sample, 2)  
156 classification metrics, 3) execution times, and 4) standard output, including a log that indicates the arguments  
157 that were used, thus supporting reproducibility. When nested cross-validation is performed, ShinyLearner  
158 produces output for every hyperparameter combination that was tested in the nested folds and indicates  
159 which combination performed best for each algorithm.

160 ShinyLearner supports the following classification metrics:

- 161 • AUROC (Area under the receiver operating characteristic curve)[38]
- 162 • Accuracy (proportion of samples whose discrete prediction was correct)
- 163 • Balanced accuracy (to account for class imbalance)
- 164 • Brier score[39]
- 165 • F1 score[40]
- 166 • False discovery rate
- 167 • False negative rate
- 168 • False positive rate
- 169 • Matthews correlation coefficient[41]
- 170 • Mean misclassification error
- 171 • Negative predictive value
- 172 • Positive predictive value
- 173 • Recall (sensitivity)
- 174 • True negative rate (specificity)

- 175 • True positive rate (sensitivity)

176 To calculate these metrics and to perform other data-processing tasks, ShinyLearner uses the AUC[42],  
177 mlr[15], dplyr[43], data.table[44], and readr[45] packages. For multiclass problems, ShinyLearner allows the  
178 underlying machine-learning packages to use whatever strategy they have implemented for classifying with  
179 multiple classes. ShinyLearner then calculates performance metrics in a one-versus-rest manner and averages  
180 results across the class options.

181 When feature selection is performed, each algorithm produces a ranked list of features for each nested  
182 training set. To aid the user in understanding which features are most informative, ShinyLearner aggregates  
183 these ranked lists using the *Borda count* method[46]. These aggregate rankings are stored in tab-delimited  
184 output files.

## 185 **Availability of source code and requirements**

- 186 • *Project name*: ShinyLearner
- 187 • *Project home page*: <https://github.com/srp33/ShinyLearner>
- 188 • *Operating system(s)*: Any operating system on which Docker can be installed
- 189 • *Programming languages*: Java, Python, R, bash
- 190 • *Other requirements*: Docker (<https://docker.com>)
- 191 • *License*: MIT

192 The steps of preparing the data and executing ShinyLearner for the results described in this article are in a  
193 Jupyter notebook (see [https://github.com/srp33/ShinyLearner/blob/master/Demo/Execute\\_Algorithms.ipynb](https://github.com/srp33/ShinyLearner/blob/master/Demo/Execute_Algorithms.ipynb)).  
194 The code for creating the figures in this manuscript can be found (and re-executed) in a Code Ocean capsule  
195 (<https://doi.org/10.24433/CO.5449763.v1>). We used the ggplot2 and cowplot packages[47,48] to create  
196 figures.

## 197 **Analyses**

198 ShinyLearner enables researchers to perform classification benchmark studies. To illustrate this functionality,  
199 we performed three types of benchmark: 1) basic classification with default hyperparameters, 2)  
200 classification with hyperparameter optimization, and 3) classification with feature selection. For each  
201 analysis, we used 10 classification algorithms:



- 202 • `keras/dnn` - Deep neural networks (implemented in Keras/TensorFlow)[27,29,49]
- 203 • `mlr/h2o.randomForest` - Random forests (implemented in mlr, h2o)[15,28]
- 204 • `mlr/mlp` - Multilayer perceptron (mlr)[50]
- 205 • `mlr/xgboost` - xgboost (mlr)[51]
- 206 • `sklearn/decision_tree` - Decision tree (implemented in scikit-learn)[13,52]
- 207 • `sklearn/logistic_regression` - Logistic regression with the LIBLINEAR solver
- 208     (scikit-learn)[53]
- 209 • `sklearn/svm` - Support vector machines (scikit-learn)[54]
- 210 • `weka/HoeffdingTree` - Hoeffding tree (implemented in Weka)[14,55]
- 211 • `weka/MultilayerPerceptron` - Multilayer perceptron (Weka)
- 212 • `weka/SimpleLogistic` - Simple logistic regression (Weka)[56]

213 In the third analysis, we used 10 feature-selection algorithms:

- 214 • `mlr/kruskal.test` - Kruskal-Wallis rank sum test (mlr)[57]
- 215 • `mlr/randomForestSRC.rfsrc` - Permuted random forests (mlr)[58]
- 216 • `sklearn/mutual_info` - Mutual information (scikit-learn)[59]
- 217 • `sklearn/random_forest_rfe` - Random forests—recursive feature elimination (scikit-learn)[60,61]
- 218 • `sklearn/svm_rfe` - Support vector machines—recursive feature elimination (scikit-learn)[61]
- 219 • `weka/Correlation` - Pearson’s correlation (Weka)[62]
- 220 • `weka/GainRatio` - Information gain ratio (Weka)[52]
- 221 • `weka/OneR` - OneR (Weka)[63]
- 222 • `weka/ReliefF` (Weka)[64]
- 223 • `weka/SymmetricalUncertainty` - Symmetrical uncertainty (Weka)[65]

224 In each analysis, we used 5 rounds of Monte Carlo cross validation. For the second and third analyses, we  
225 used 3 rounds of *nested* Monte Carlo cross validation for each *outer* round of cross validation. In the third  
226 analysis, we evaluated the top-ranked 1, 3, 5, 10, 15, 20, 50, and 200 features and identified the best of these  
227 options via nested cross validation. In evaluating the results, we focused on area under the receiver operating  
228 characteristic curve (AUROC) because this metric can be applied to probabilistic predictions and accounts  
229 for class imbalance.

230 As an initial test, we generated a “null” dataset using numpy[66]. We used this dataset to verify that  
231 ShinyLearner produces classification results in line with random-chance expectations when no signal is  
232 present. This dataset consisted of 20 numeric variables (mean = 0, standard deviation = 1) and 10 categorical

233 variables across 500 simulated samples. AUROC values for all classification algorithms were near 0.5, as  
234 expected by random chance, irrespective of whether hyperparameter optimization or feature selection was  
235 performed (Figure S2).

236 Next, we collected 10 biomedical datasets from the Penn Machine Learning Benchmarks repository[67]:

- 237 • Acquired Immune Deficiency Syndrome (AIDS) categorical data[68]
- 238 • Thyroid disease[52]
- 239 • Breast cancer[69]
- 240 • Dermatology[70]
- 241 • Diabetes
- 242 • Hepatitis[71]
- 243 • Iris[72]
- 244 • Liver disorder[73]
- 245 • Molecular biology (promoter gene sequences)[74]
- 246 • Yeast[75]

247 These datasets vary by number of samples (minimum = 51; maximum = 7201) and number of features (min  
248 = 5; max = 172). For all datasets, we converted categorical variables to multiple binary variables using  
249 one-hot encoding. When executing ShinyLearner, we scaled numeric values using scikit-learn's  
250 RobustScaler, which subtracts the median and scales the data based on the interquartile range[76];  
251 accordingly, this method is robust to outliers. In addition, we used ShinyLearner to impute missing values;  
252 this method uses the median for numeric variables and the mode for categorical variables.

### 253 **Classification analysis with default hyperparameters**

254 Initially, we applied 10 classification algorithms to 10 biomedical datasets using default hyperparameters.  
255 Most algorithms made near-perfect predictions for the Thyroid, Dermatology, and Iris datasets, whereas  
256 predictions were less accurate overall for the remaining datasets (Figure 1). The weka/HoeffdingTree and  
257 sklearn/decision\_tree algorithms often underperformed relative to the other algorithms (Figure 2).  
258 Indeed, for half of the datasets, weka/HoeffdingTree performed as poorly or worse than would be  
259 expected by random chance. The remaining 8 classification algorithms performed relatively well, but  
260 predictive performance varied considerably across the datasets (Figure S3). For example, the AUROC for

261 mlr/mlp and sklearn/logistic\_regression was 0.07 higher than the median on the AIDS dataset; the  
262 AUROC for sklearn/svm was 0.14 lower than the median.

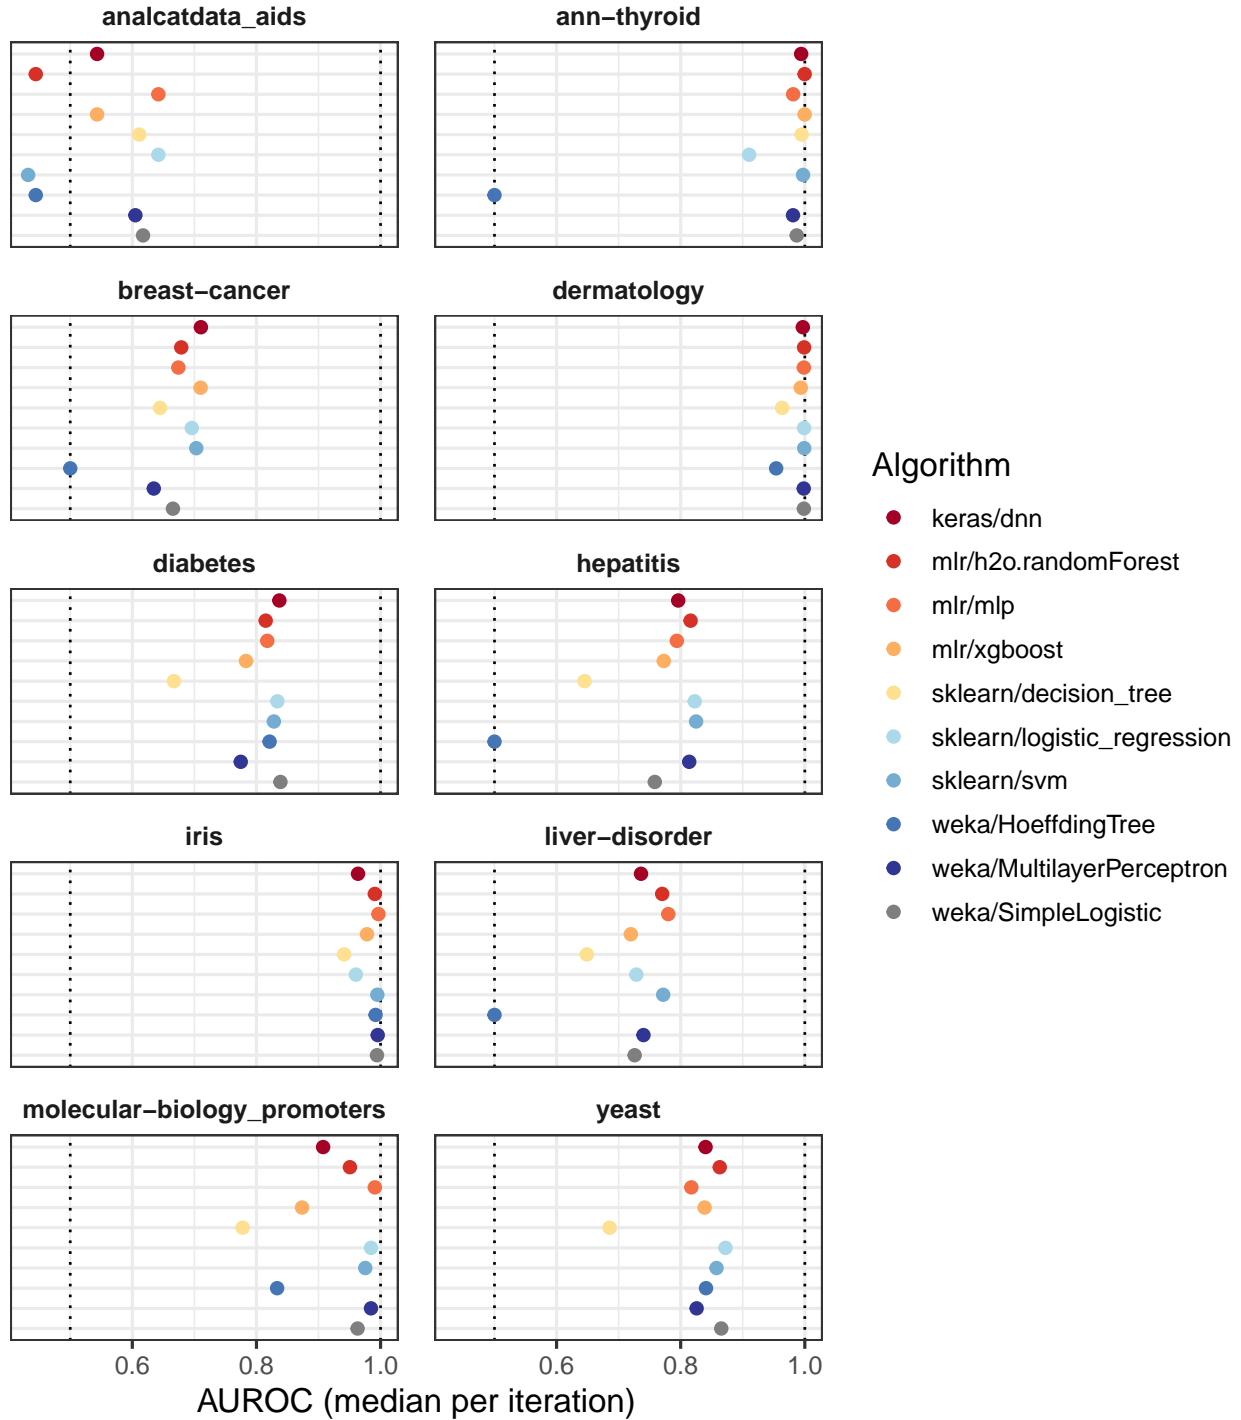

263

264 **Figure 1: Classification performance per dataset (default hyperparameters).** We evaluated the  
265 predictive performance of 10 classification algorithms on 10 biomedical datasets. These results were  
266 generated using default hyperparameters for each algorithm. We measured predictive performance using the

267 receiver operating characteristic curve (AUROC) and calculated the median across 5 Monte Carlo iterations.  
268 Predictive performance differed considerably across and within the datasets.

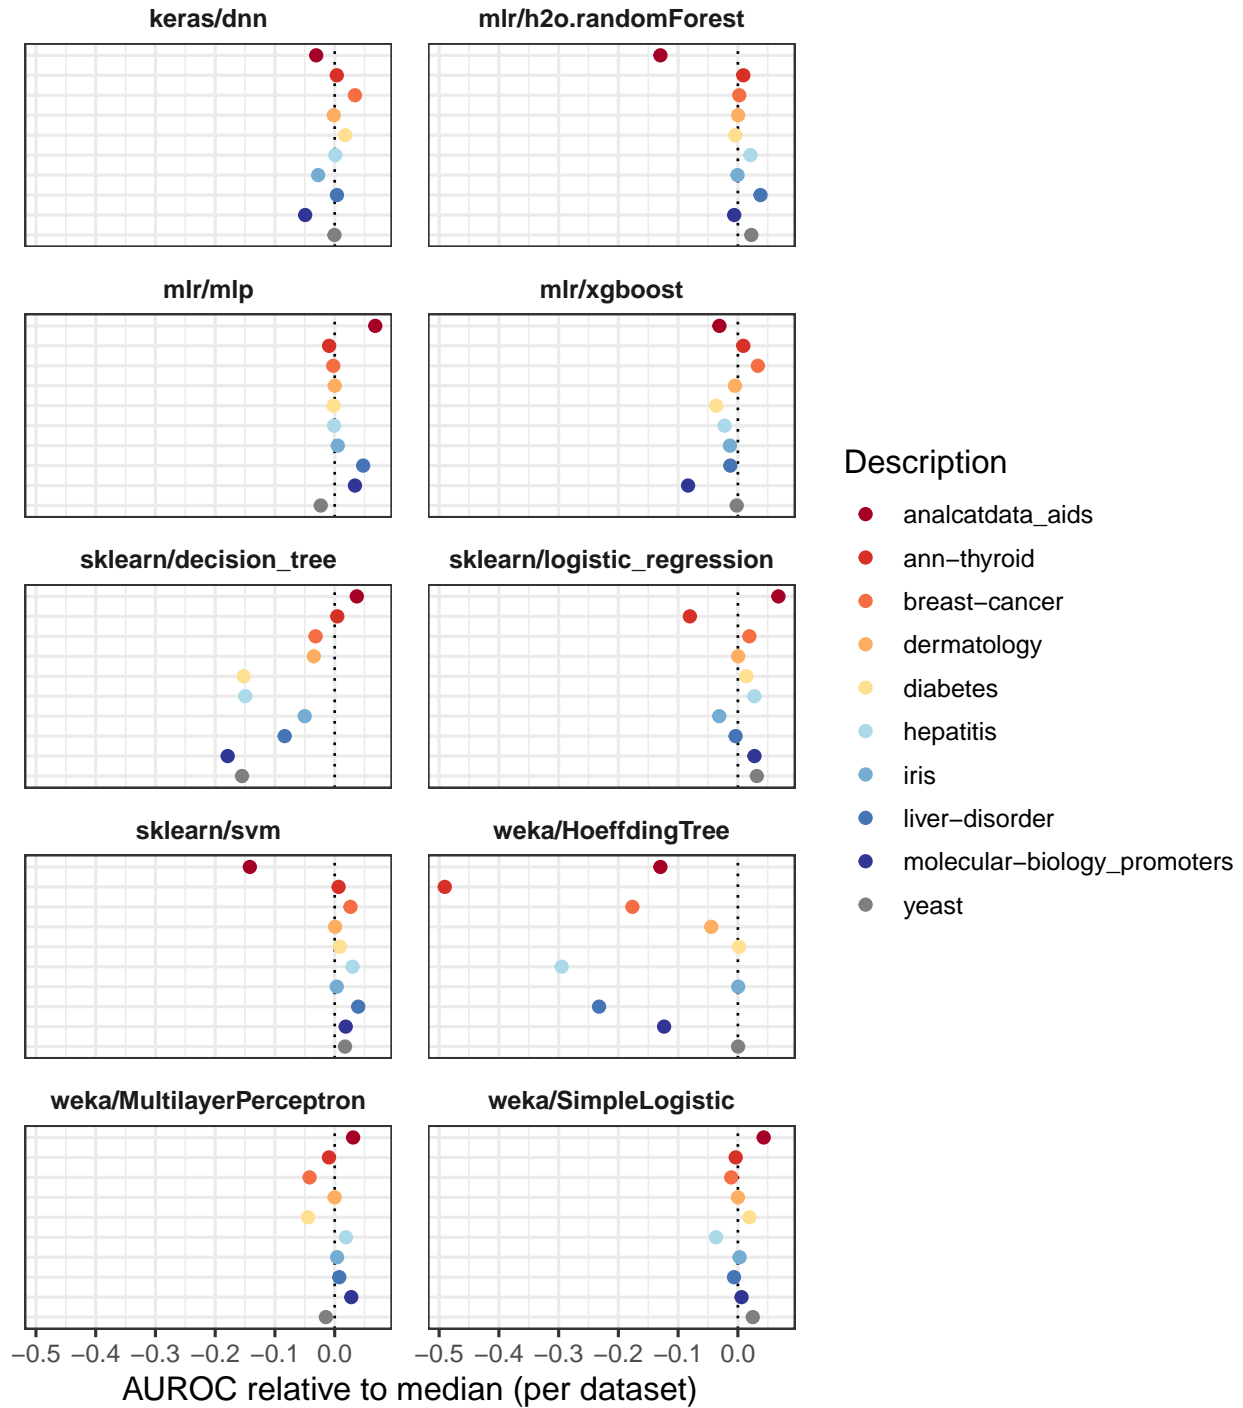

269

270 **Figure 2: Classification performance per algorithm relative to other classification algorithms (default**  
 271 **hyperparameters).** We evaluated the predictive performance of 10 classification algorithms on 10  
 272 biomedical datasets. These results were generated using default hyperparameters for each algorithm. For  
 273 each dataset, we calculated the AUROC for each algorithm relative to the median across all algorithms. The

274 weka/HoeffdingTree and sklearn/decision\_tree algorithms underperformed in comparison to the  
275 other algorithms.

276 Across the Monte Carlo iterations for each dataset, the predictive performance of  
277 `sklearn/decision_tree` and `weka/MultilayerPerceptron` varied most, whereas  
278 `weka/HoeffdingTree` varied least (in part because AUROC was frequently 0.5) (Figure S4). The  
279 `keras/dnn` and `mlr/h2o.randomForest` algorithms took longest to execute, whereas `sklearn/svm` and  
280 `sklearn/logistic_regression` were among the fastest (and most accurate) algorithms (Figure S5). Two  
281 pairs of classification algorithms use similar theoretical approaches but were implemented in different  
282 machine-learning libraries; multilayer perceptron was implemented in Weka and mlr; logistic regression was  
283 implemented in Weka and scikit-learn. The AUROC values were strongly—but not perfectly—correlated  
284 between these pairs of implementations (Figures S6 and S7).

285 With the exception of `sklearn/decision_tree`, all classification algorithms produced sample-wise,  
286 probabilistic predictions. We examined these predictions for the Diabetes dataset and found that the range  
287 and shape of these predictions differed widely across the algorithms (Figure 3). Although many classification  
288 metrics, including AUROC, can cope with distributional differences, these differences must be considered in  
289 multiple classifier systems[77].



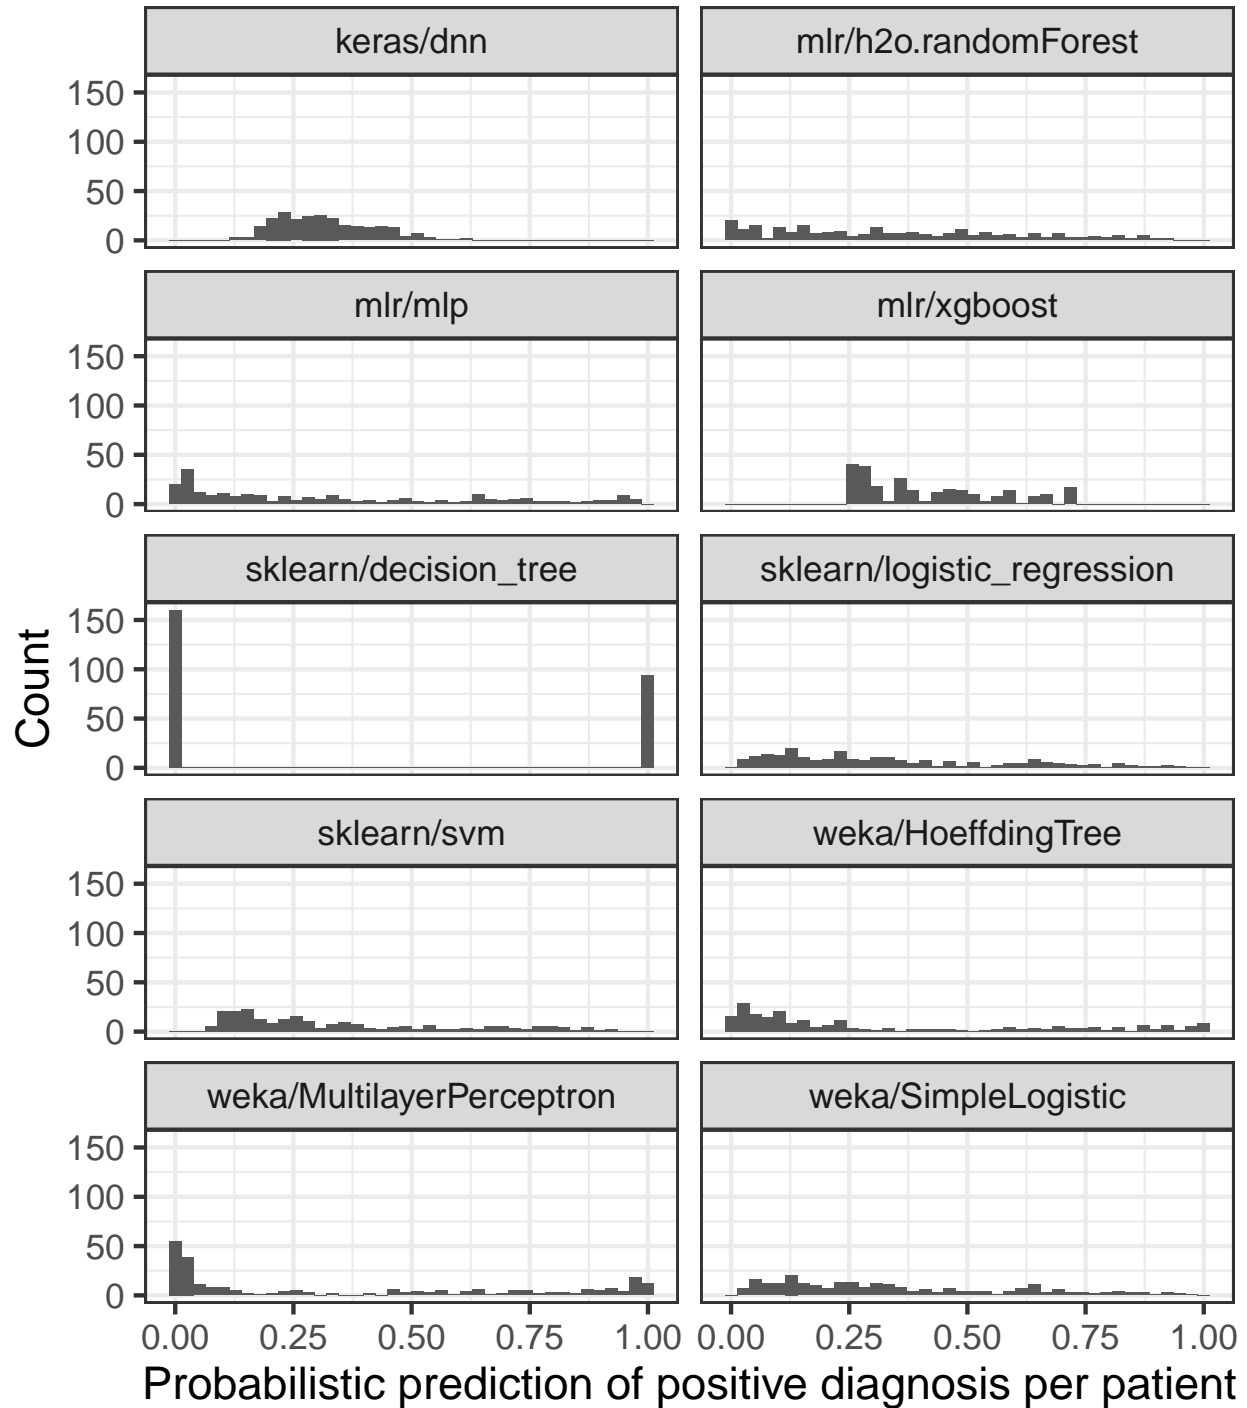

290

291 **Figure 3: Sample-level predictions for each algorithm on the Diabetes dataset (default**  
292 **hyperparameters).** The Diabetes dataset includes a class variable indicating whether or not patients  
293 received a positive diagnosis. Each panel of this figure shows positive-diagnosis predictions for each  
294 classification algorithm. All algorithms except `sklearn/decision_tree` produced probabilistic  
295 predictions. The range and distribution of these predictions differed greatly across the algorithms.

## 296 **Classification analysis with hyperparameter optimization**

297 In the second analysis, we applied the same classification algorithms to the same datasets but allowed  
298 ShinyLearner to perform hyperparameter optimization via nested cross validation. As few as 2  
299 (mlr/xgboost) and as many as 95 (sklearn/decision\_tree and weka/MultilayerPerceptron)  
300 hyperparameter combinations were available for each algorithm. In nearly every example, classification  
301 performance improved after hyperparameter optimization (Figure 4), sometimes dramatically. The  
302 performance improvements were most drastic for the weka/HoeffdingTree and  
303 sklearn/decision\_tree algorithms, which often performed poorly with default parameters.

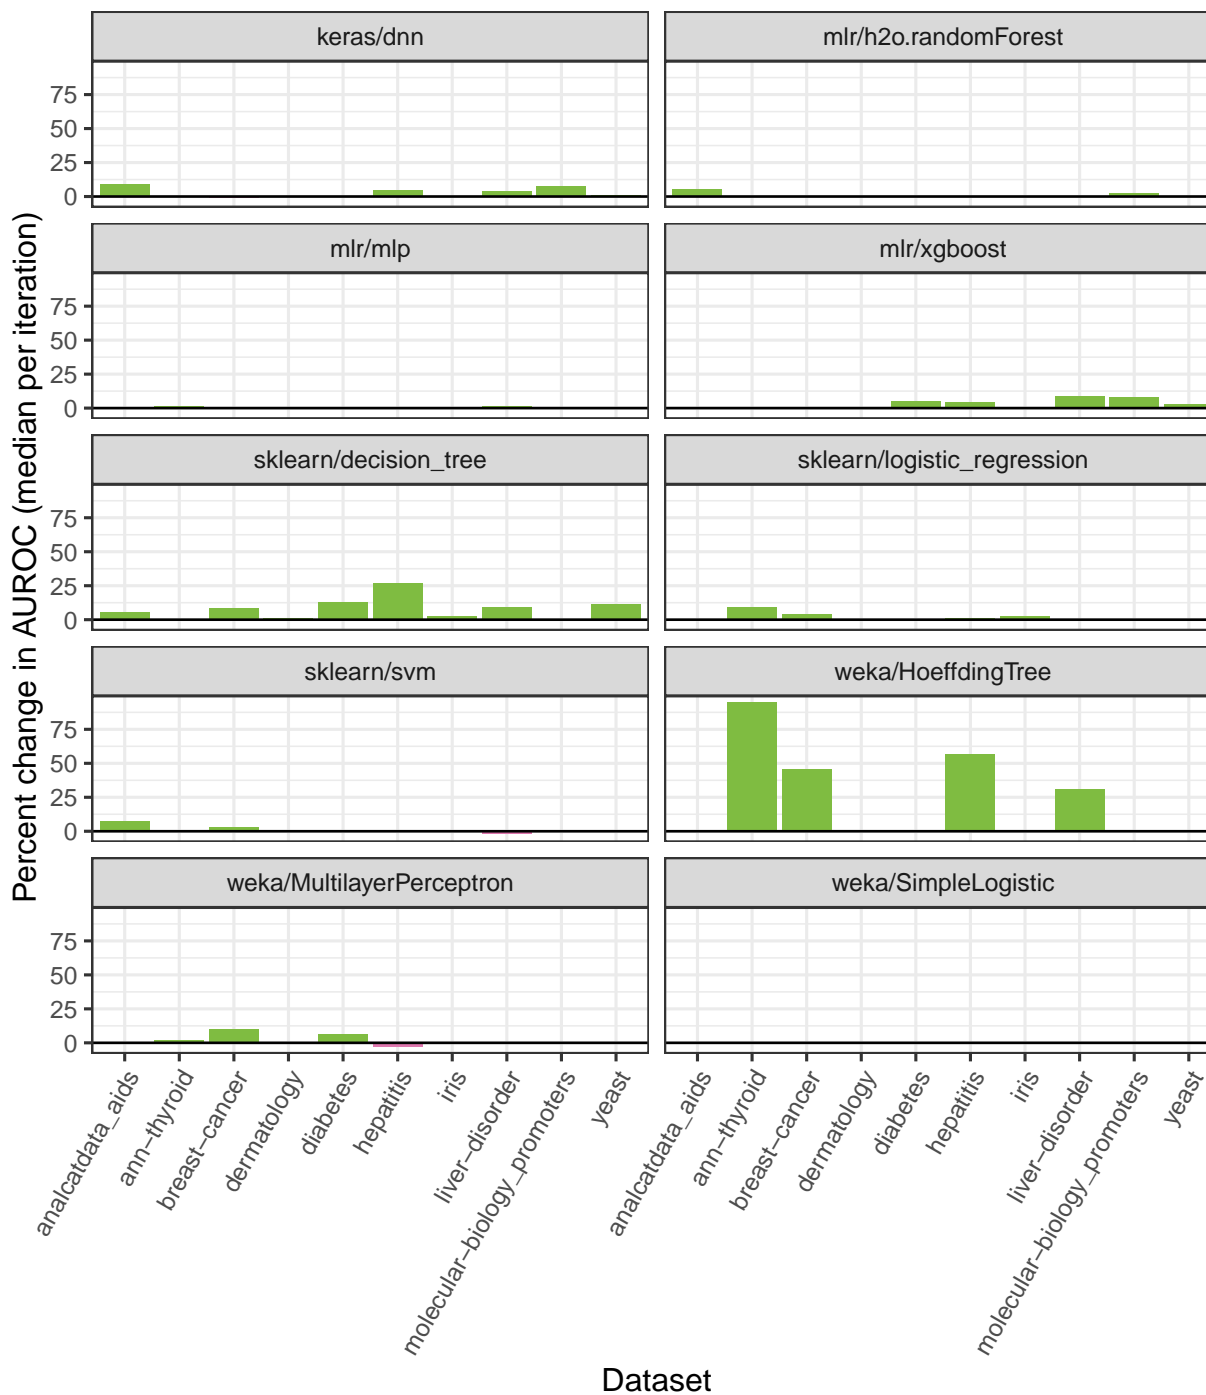

304

305 **Figure 4: Classification performance when optimizing vs. not optimizing hyperparameters.** We tested  
306 10 classification algorithms on 10 biomedical datasets and used nested cross validation to select  
307 hyperparameters. To evaluate for change in predictive performance, we calculated the percent change in the  
308 median AUROC values when using optimized vs. default hyperparameters. Most algorithms demonstrated  
309 improved classification performance with optimized hyperparameters.

310 ShinyLearner supports 53 hyperparameter combinations for the `keras/dnn` algorithm. Each of these  
311 combinations altered the algorithm's performance at least to a small degree on every dataset (Figure S8). The  
312 Thyroid dataset varied least across the hyperparameter combinations, perhaps because the number of  
313 instances ( $n = 7200$ ) was nearly 10 times larger than any other dataset. Generally, this algorithm performed  
314 better with a wider architecture containing only two layers. Having a wider structure greatly increases the  
315 parameter space of the network and allows it to learn more complex relationships among features, while  
316 limiting the network to only two layers prevents overfitting, a common problem when applying neural  
317 networks to datasets with a limited number of instances. In addition, adding dropout and L2 regularization  
318 also helps to prevent the network from overfitting. In tuning these hyperparameters, we found that a smaller  
319 dropout rate, more training epochs, and a smaller regularization rate resulted in higher AUROC values  
320 (Figure S9). Figure S10 illustrates for the Diabetes dataset that diagnosis predictions can differ considerably,  
321 depending on which hyperparameter combination is used.

#### 322 **Classification analysis with feature selection**

323 In any dataset, some features are likely to be more informative than other features. We used ShinyLearner to  
324 perform feature selection (via nested cross validation) before classification. In total, we evaluated 100 unique  
325 combinations of feature-selection algorithm and classification algorithm (with default hyperparameters). In  
326 44% of cases, feature selection increased the median AUROC, whereas it decreased AUROC in 39% of cases  
327 (Figure 5). Feature selection sometimes improved the performance of `weka/HoeffdingTree` and  
328 `sklearn/decision_tree`, which were the lowest performers without feature selection.

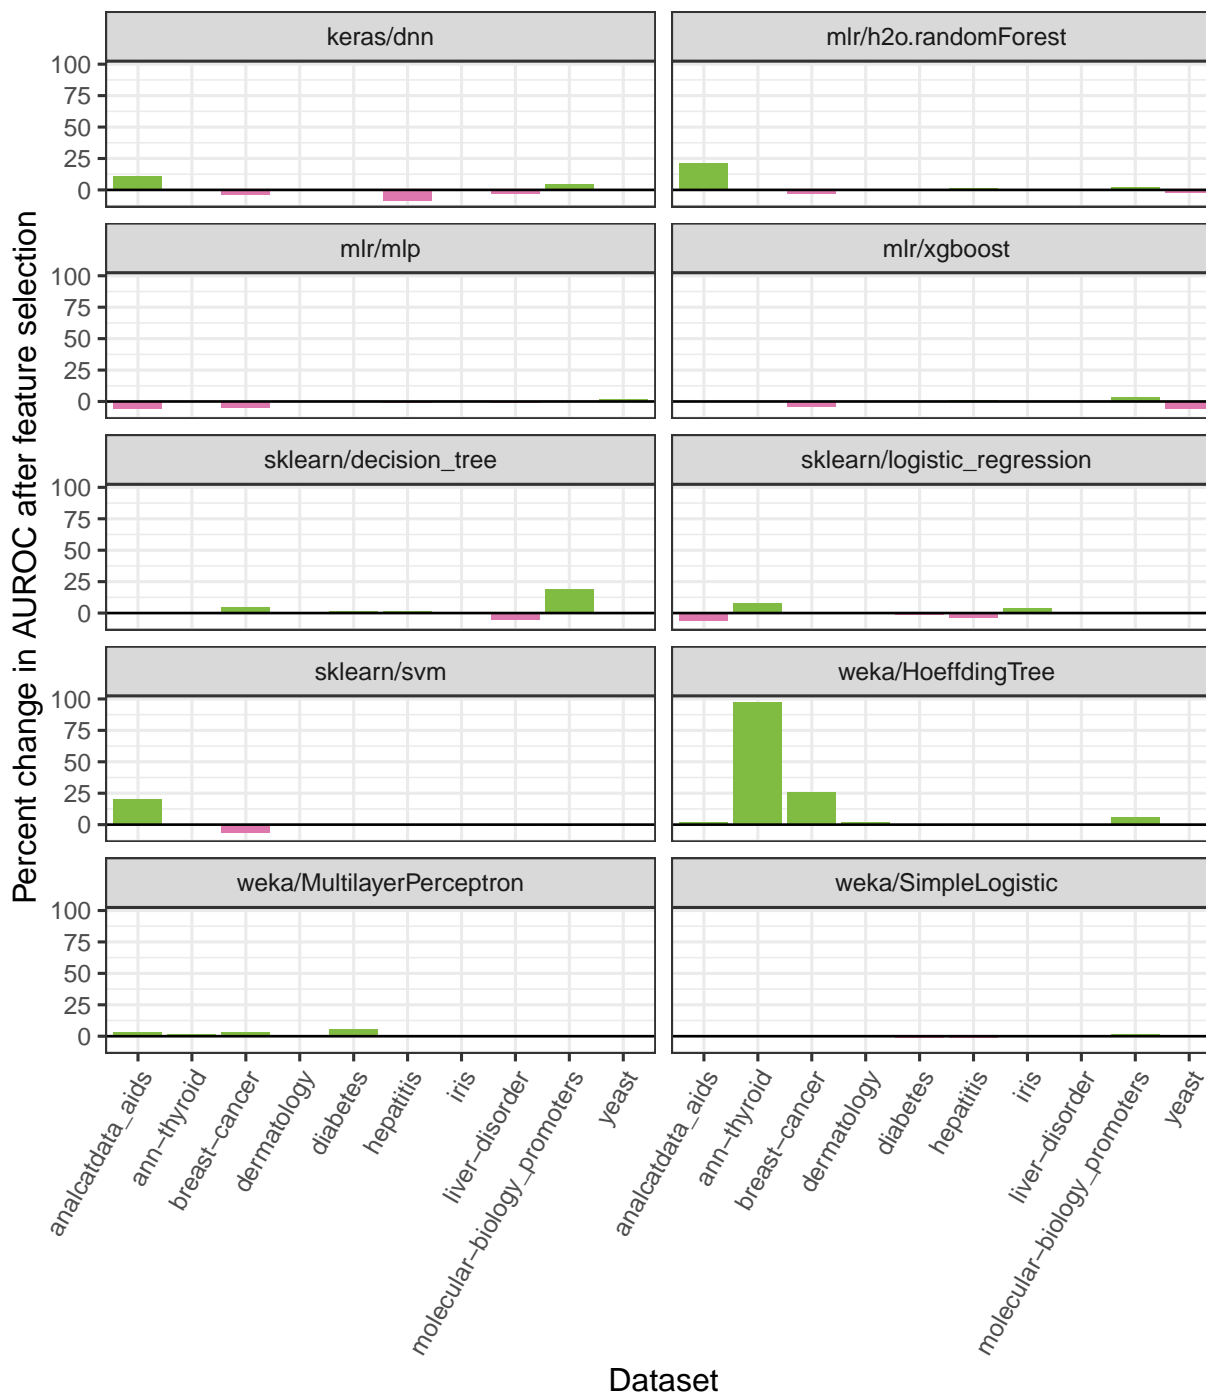

329

330 **Figure 5: Classification performance when performing feature selection vs. not performing feature**  
 331 **selection.** In combination with classification, we performed feature selection via nested cross validation on  
 332 10 biomedical datasets. For each algorithm, we used default hyperparameters. These plots show the percent  
 333 change in the median AUROC when using vs. not using feature selection. Although the effects of feature  
 334 selection varied across the algorithms, median AUROCs increased in many cases.

335 Figure 6 illustrates the relative predictive ability of each combination of feature-selection and classification  
336 algorithms. The `mlr/randomForestSRC.rfsrc` and `sklearn/random_forest_rfe` algorithms  
337 performed best on average; both approaches use the Random Forests algorithm to evaluate feature relevance.  
338 The `weka/OneR` algorithm, which evaluates a single feature at a time in isolation, performed worst. Across  
339 the datasets, the combination of `mlr/randomForestSRC.rfsrc` (feature selection) and `mlr/xgboost`  
340 (classification) performed best. Perhaps surprisingly, the combination of `sklearn/svm_rfe` (feature  
341 selection) and `sklearn/svm` (classification), which are both based on Support Vector Machines, was ranked  
342 in the bottom quartile.

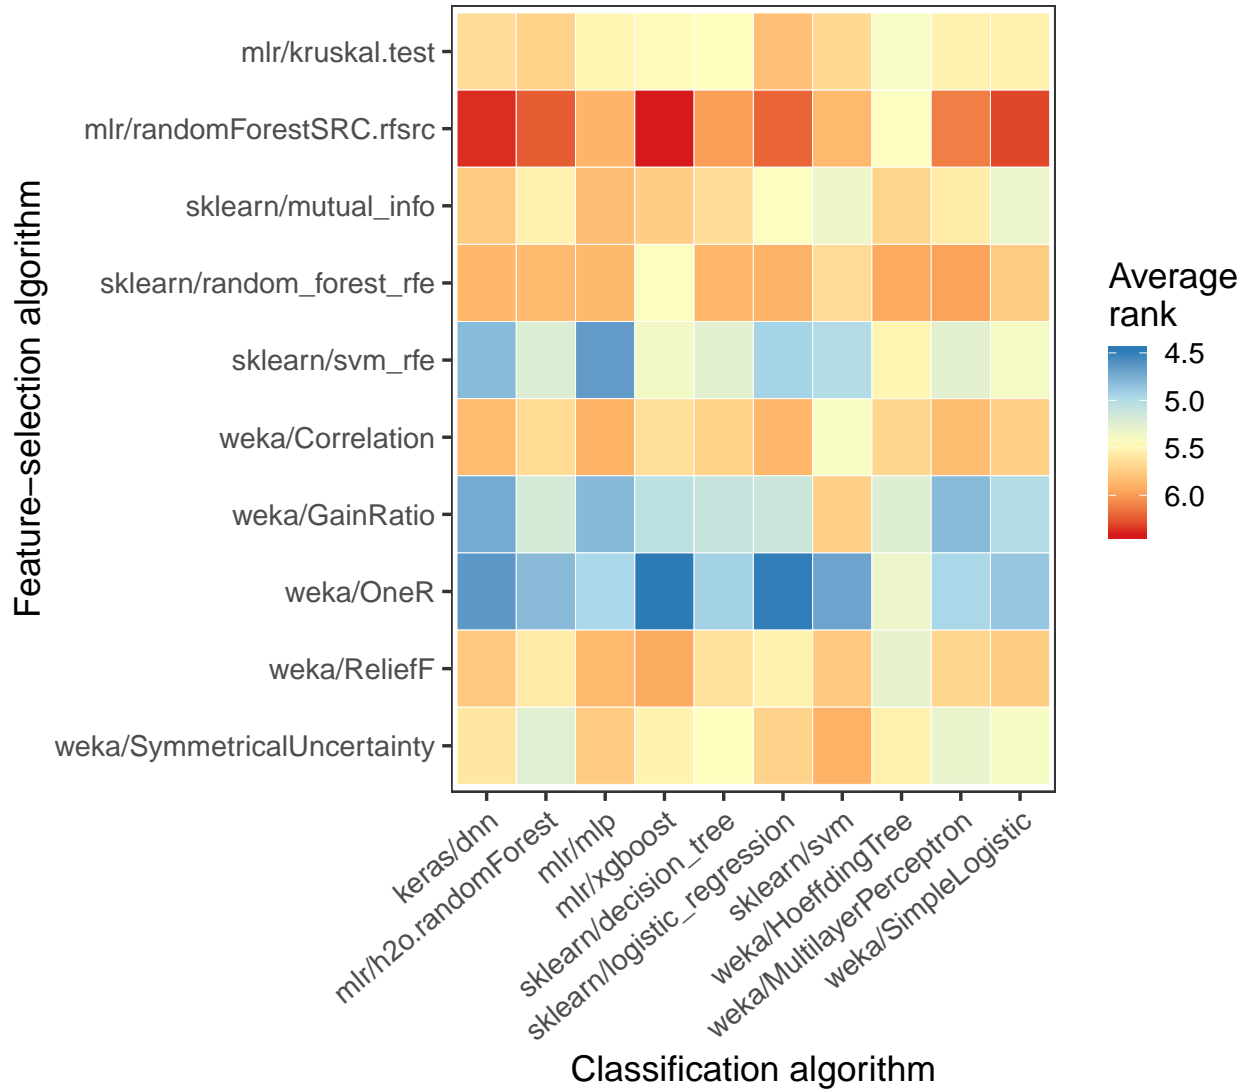

343

344 **Figure 6: Performance for each combination of classification and feature-selection algorithm.** This  
345 figure shows classification results for the nested cross-validation folds across each combination of  
346 feature-selection algorithm and classification algorithm. Averaged across all datasets and classification  
347 algorithms, we ranked the feature-selection algorithms based on AUROC values attained for nested  
348 validation sets. For simplicity and consistency across the datasets, this figure shows only the results when the  
349 top-5 features were used. Higher average ranks indicate better classification performance.

350 In seeking to identify the most informative features, ShinyLearner evaluated various quantities of top-ranked  
351 features via nested cross validation. Figure 7 illustrates the relative performance of each of these quantities  
352 on each dataset. In all cases but one, using one feature performed worst. Generally, a larger number of  
353 features resulted in higher AUROC values. However, more features sometimes decreased performance. For  
354 example, on the breast-cancer dataset, the highest AUROC values were attained using 3 out of 14 features.



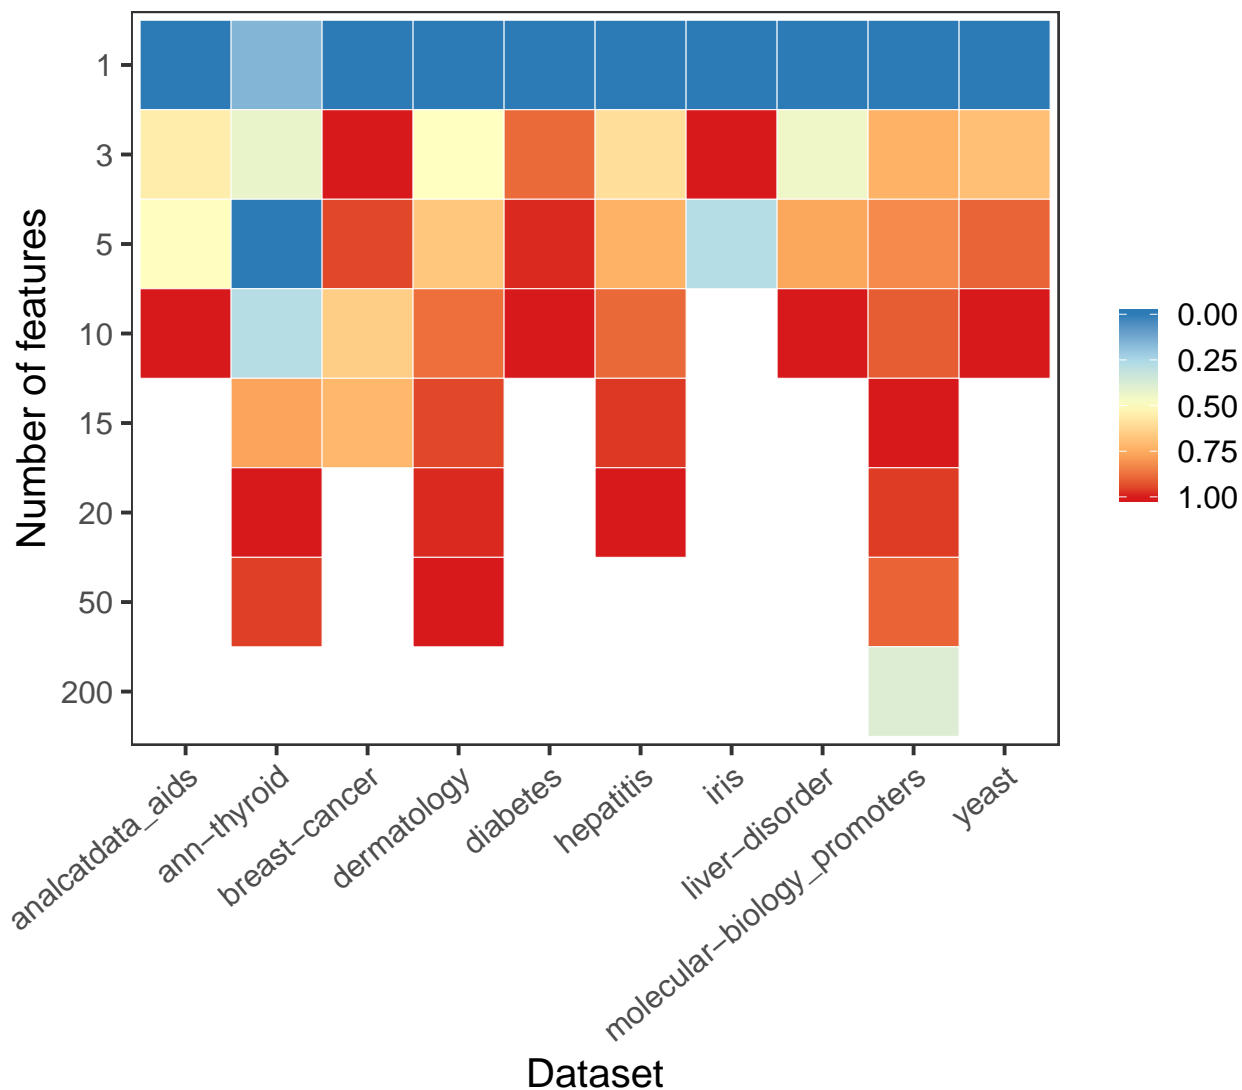

355

356 **Figure 7: Median classification performance of feature-selection algorithms by number of features.**

357 We applied feature selection to each dataset and selected the top  $x$  number of features. This figure shows  
358 which values of  $x$  resulted in the highest AUROC values for each dataset, averaged across all  
359 feature-selection algorithms. Different datasets had different quantities of features; this graph only shows  
360 results for  $x$  values relevant to each dataset. Accordingly, we scaled the AUROC values in each column  
361 between zero and one to ensure that the comparisons were consistent across all datasets. Higher values  
362 indicate better classification performance. Generally, a larger number of features resulted in better  
363 classification performance, but this varied across the datasets.

364 ShinyLearner can inform users about which features are most informative for classification. In the  
365 Dermatology dataset, these feature ranks were highly consistent across the feature-selection algorithms  
366 (Figure S11). The goal of this classification problem was to predict a patient's type of Erythematous-Squamous  
367 disease. Elongation and clubbing of the rete ridges as well as thinning of the suprapapillary epidermis were  
368 most highly informative of disease type, whereas features such as the patient's age were less informative.

## 369 Discussion

370 The machine-learning community has developed an abundance of algorithms and software implementations  
371 of those algorithms. Life scientists use these resources for many research applications. But they face the  
372 challenge of identifying which algorithms and hyperparameters will be most accurate and which features are  
373 most informative for a given dataset. Many researchers limit classification analyses to a single algorithm,  
374 perhaps one that is familiar to them or that has been reported in the literature for a similar study. Others may  
375 try a large number of algorithms; however, performing benchmark comparisons in an *ad hoc* manner requires  
376 a considerable coding effort and can introduce biases if done improperly. Alternatively, some researchers  
377 may develop new algorithms without providing evidence that these algorithms outperform existing ones. We  
378 developed ShinyLearner as a way to simplify the process of performing classification benchmark studies.

379 ShinyLearner does not implement any classification or feature-selection algorithm; rather, it serves as a  
380 wrapper around existing software implementations. Currently, algorithms from Weka, scikit-learn, mlr, h2o,  
381 and Keras are supported in ShinyLearner. In aggregate, these algorithms represent a diverse range of  
382 methodological approaches and thus can support comprehensive benchmark evaluations. On their own, each  
383 of the third-party tools encapsulated within ShinyLearner provides a way to optimize hyperparameters  
384 programmatically and perform feature selection. In addition, tools such as caret[17], KNIME[18], and  
385 Orange[78] provide these options. Thus, in situations where a researcher has programming expertise and is  
386 satisfied with the algorithms and tuning functionality available in one of those tools, the researcher might  
387 prefer to use these tools directly rather than use ShinyLearner. ShinyLearner is most useful when a  
388 researcher:

- 389 1. wishes to compare algorithms that have been implemented in multiple machine-learning packages,
- 390 2. does not have programming expertise,
- 391 3. desires to perform complex operations via nested cross validation, such as evaluating different sizes of  
392 feature subsets,

- 393 4. wishes to analyze algorithm performance using a tool or programming language that is different than  
394 was used to perform classification,
- 395 5. wishes to gain deeper insight into decisions made during nested cross validation, and/or
- 396 6. seeks to evaluate the tradeoff between predictive accuracy and time of execution.

397 ShinyLearner is limited to datasets that fit into computer memory. For larger datasets, frameworks such as  
398 Apache SystemML support distributed algorithm execution[79]; however, the number of algorithms  
399 implemented in these frameworks is still relatively small.

400 The current release of ShinyLearner supports diverse classification algorithms and hyperparameter  
401 combinations; however, this collection is far from exhaustive. Using ShinyLearner’s extensible architecture,  
402 the research community can integrate additional algorithms and hyperparameter combinations. In addition,  
403 algorithm designers can use our framework to compare their algorithms against competing methods and  
404 disseminate their algorithms to the research community.

405 Containers provide many advantages for software deployment. Tool installation and computational  
406 reproducibility are easier because all software components are encapsulated within the container, and  
407 container images can be archived and versioned[80]. One other benefit may be less apparent:  
408 containerization facilitates the use of diverse programming languages. Distinct components of ShinyLearner  
409 are implemented in 4 different programming languages. We chose this approach because we determined that  
410 each language was suited to specific types of tasks. We posit that the future of bioinformatics development  
411 will increasingly follow this pattern. Furthermore, we advocate for the approach of providing a graphical user  
412 interface, such as the Web-based tool we provided for ShinyLearner. Such tools make it easier for  
413 users—especially those who have limited command-line experience—to formulate Docker commands.

414 Our analysis of 10 biomedical datasets, 10 classification algorithms, and 10 feature-selection algorithms  
415 confirmed that the choice of algorithm and hyperparameters has a considerable impact on classification  
416 performance and selected features. Although some algorithms typically performed better than others, no  
417 single algorithm consistently outperformed any other. This finding supports the “No Free Lunch”  
418 theorem[81] and confirms that multiple classifier systems hold promise for aggregating evidence across  
419 algorithms[82]. Also importantly, algorithm performance is likely to differ according to data characteristics.  
420 Algorithms that perform well on “wide” datasets (many features, few samples) may not perform as well on  
421 “tall” datasets. Algorithms that perform well with numeric data may not perform as well on categorical or  
422 mixed data. These differences highlight the importance of domain-specific benchmark comparisons.

## 423 **Declarations**

### 424 **List of abbreviations**

425 AUROC = Area under receiver operating characteristic curve

426 API = application programming interface

### 427 **Ethics approval and consent to participate**

428 Not applicable.

### 429 **Consent for publication**

430 Not applicable.

### 431 **Competing interests**

432 The authors declare that they have no competing interests.

### 433 **Funding**

434 SRP was supported by internal funds from Brigham Young University. TJL and KH were supported by  
435 fellowships from the Simmons Center for Cancer Research at Brigham Young University.

### 436 **Author's contributions**

437 SRP, TJL, and KH helped to develop the software. SRP conceived of the software design with critical input  
438 from TJL and KH. ES and SRP performed the analyses described in the manuscript. All authors helped to  
439 write the manuscript.

## 440 **References**

- 441 1. Shipp MA, Ross KN, Tamayo P, Weng AP, Kutok JL, Aguiar RCT, et al. Diffuse large B-cell lymphoma  
442 outcome prediction by gene-expression profiling and supervised machine learning. *Nature Medicine*.  
443 2002;8:68–74.
- 444 2. Nutt CL, Mani DR, Betensky RA, Tamayo P, Cairncross JG, Ladd C, et al. Gene Expression-based  
445 Classification of Malignant Gliomas Correlates Better with Survival than Histological Classification. *Cancer*  
446 *Res*. 2003;63:1602–7.
- 447 3. Yuan Y, Van Allen EM, Omberg L, Wagle N, Amin-Mansour A, Sokolov A, et al. Assessing the clinical  
448 utility of cancer genomic and proteomic data across tumor types. *Nature Biotechnology*. 2014;32:644–52.
- 449 4. Bilal E, Dutkowski J, Guinney J, Jang IS, Logsdon BA, Pandey G, et al. Improving Breast Cancer Survival  
450 Analysis through Competition-Based Multidimensional Modeling. *PLoS Computational Biology*.  
451 2013;9:e1003047.
- 452 5. Piccolo SR, Andrulis IL, Cohen AL, Conner T, Moos PJ, Spira AE, et al. Gene-expression patterns in  
453 peripheral blood classify familial breast cancer susceptibility. *BMC medical genomics*. 2015;8:72.
- 454 6. Piccolo SR, Frey LJ. Clinical and molecular models of glioblastoma multiforme survival. *International*  
455 *Journal of Data Mining and Bioinformatics*. 2013;7:245–65.
- 456 7. Desautels T, Calvert J, Hoffman J, Jay M, Kerem Y, Shieh L, et al. Prediction of Sepsis in the Intensive  
457 Care Unit With Minimal Electronic Health Record Data: A Machine Learning Approach. *JMIR medical*  
458 *informatics*. 2016;4:e28.
- 459 8. Szlosek DA, Ferrett J. Using Machine Learning and Natural Language Processing Algorithms to  
460 Automate the Evaluation of Clinical Decision Support in Electronic Medical Record Systems. *EGEMS*  
461 (Washington, DC). 2016;4:1222.
- 462 9. Statnikov A, Aliferis CF, Tsamardinos I, Hardin D, Levy S. A comprehensive evaluation of multicategory  
463 classification methods for microarray gene expression cancer diagnosis. *Bioinformatics*. 2005;21:631–43.
- 464 10. Kim J-W, Sharma V, Ryan ND. Predicting Methylphenidate Response in ADHD Using Machine  
465 Learning Approaches. *The International Journal of Neuropsychopharmacology*. 2015;18:pyv052.
- 466 11. Braman NM, Etesami M, Prasanna P, Dubchuk C, Gilmore H, Tiwari P, et al. Intratumoral and  
467 peritumoral radiomics for the pretreatment prediction of pathological complete response to neoadjuvant  
468 chemotherapy based on breast DCE-MRI. *Breast cancer research: BCR*. 2017;19:57.

- 469 12. Libbrecht MW, Noble WS. Machine learning applications in genetics and genomics. *Nature Reviews*  
470 *Genetics*. 2015;16:321–32.
- 471 13. Pedregosa F, Varoquaux G. *Scikit-learn: Machine learning in Python*. 2011.
- 472 14. Frank E, Hall M, Holmes G, Kirkby R, Pfahringer B, Witten IH, et al. Weka-A Machine Learning  
473 Workbench for Data Mining. In: Maimon O, Rokach L, editors. *Data Mining and Knowledge Discovery*  
474 *Handbook*. 2nd ed. New York: Springer Science+Business Media, LLC; 2010. pp. 1269–77.
- 475 15. Bischl B, Lang M, Kotthoff L, Schiffner J, Richter J, Jones Z, et al. *MLr: Machine Learning in R*. 2016.
- 476 16. Piccolo SR, Frey LJ. ML-Flex : A Flexible Toolbox for Performing Classification Analyses In Parallel.  
477 *Journal of Machine Learning Research*. 2012;13:555–9.
- 478 17. Kuhn M, others. Building predictive models in R using the caret package. *Journal of statistical software*.  
479 2008;28:1–26.
- 480 18. Berthold MR, Cebron N, Dill F, Gabriel TR, Kötter T, Meinl T, et al. *KNIME: The Konstanz Information*  
481 *Miner. Studies in Classification, Data Analysis, and Knowledge Organization (GfKL 2007)*. Springer; 2007.
- 482 19. Guyon I, Elisseeff A. An Introduction to Variable and Feature Selection. *Journal of Machine Learning*  
483 *Research*. 2003;3:1157–82.
- 484 20. Dougherty ER, Hua J, Sima C. Performance of Feature Selection Methods. *Current Genomics*.  
485 2009;10:365–74.
- 486 21. Varma S, Simon R. Bias in error estimation when using cross-validation for model selection. *BMC*  
487 *bioinformatics*. 2006;7:91.
- 488 22. Statnikov A, Wang L, Aliferis CF. A comprehensive comparison of random forests and support vector  
489 machines for microarray-based cancer classification. *BMC bioinformatics*. 2008;9:319.
- 490 23. Fernández-Delgado M, Cernadas E, Barro S, Amorim D. Do we Need Hundreds of Classifiers to Solve  
491 Real World Classification Problems? *Journal of Machine Learning Research*. 2014;15:3133–81.
- 492 24. Piccolo SR, Frampton MB. Tools and techniques for computational reproducibility. *GigaScience*.  
493 2016;5:30.
- 494 25. Wickham H. Tidy Data. *Journal of Statistical Software*. 2014;59.
- 495 26. Docker. Docker. <https://www.docker.com/>;

- 496 27. Chollet F, others. Keras. 2015;
- 497 28. Cook D. Practical machine learning with H2O: Powerful, scalable techniques for deep learning and AI. "  
498 O'Reilly Media, Inc."; 2016.
- 499 29. Abadi M, Barham P, Chen J, Chen Z, Davis A, Dean J, et al. TensorFlow: A system for large-scale  
500 machine learning. 12th USENIX Symposium on Operating Systems Design and Implementation (OSDI 16).  
501 2016. pp. 265–83.
- 502 30. Python Software Foundation. Python Language Reference, version 3.6. 2013.
- 503 31. R Core Team. R: A Language and Environment for Statistical Computing. Vienna, Austria: R  
504 Foundation for Statistical Computing; 2019.
- 505 32. Java Software | Oracle. <https://www.oracle.com/java/>;
- 506 33. Fowler M. Continuous Integration. [martinfowler.com](http://martinfowler.com).  
507 <https://martinfowler.com/articles/continuousIntegration.html>;
- 508 34. Chang W, Cheng J, Allaire JJ, Xie Y, McPherson J. Shiny: Web Application Framework for R. 2019.
- 509 35. Harris D, Harris S. Digital design and computer architecture. Morgan Kaufmann; 2010.
- 510 36. Geisser S. The Predictive Sample Reuse Method with Applications. Journal of the American Statistical  
511 Association. 1975;70:320–8.
- 512 37. Kohavi R. A study of cross-validation and bootstrap for accuracy estimation and model selection.  
513 International Joint Conference on Artificial Intelligence. 1995;14:1137–45.
- 514 38. Green DM, Swets JA, others. Signal detection theory and psychophysics. Wiley New York; 1966.
- 515 39. Brier GW. Verification of forecasts expressed in terms of probability. Monthly Weather Review.  
516 1950;78:1–3.
- 517 40. Vickery B. Reviews: Van Rijsbergen, CJ Information retrieval. 2nd edn. London, Butterworths, 1978.  
518 208pp. Journal of librarianship. Sage Publications Sage CA: Thousand Oaks, CA; 1979;11:237–7.
- 519 41. Matthews BW. Comparison of the predicted and observed secondary structure of T4 phage lysozyme.  
520 Biochimica et Biophysica Acta (BBA) - Protein Structure. 1975;405:442–51.
- 521 42. Ballings M, Van den Poel D. AUC: Threshold independent performance measures for probabilistic  
522 classifiers. 2013.

- 523 43. Wickham H, François R, Henry L, Müller K. Dplyr: A Grammar of Data Manipulation. 2018.
- 524 44. Dowle M, Srinivasan A. Data.Table: Extension of ‘data.Frame’. 2018.
- 525 45. Wickham H, Hester J, Francois R. Readr: Read Rectangular Text Data. 2018.
- 526 46. Black D. Partial justification of the Borda count. *Public Choice*. 1976;28:1–15.
- 527 47. Wickham H. Ggplot2: Elegant Graphics for Data Analysis. Springer-Verlag New York; 2016.
- 528 48. Wilke CO. Cowplot: Streamlined Plot Theme and Plot Annotations for ‘ggplot2’. 2017.
- 529 49. Lecun Y, Bengio Y, Hinton G. Deep learning. *Nature*. 2015;521:436–44.
- 530 50. Rosenblatt F. Principles of neurodynamics. Perceptrons and the theory of brain mechanisms. Cornell  
531 Aeronautical Lab Inc Buffalo NY; 1961.
- 532 51. Chen T, Guestrin C. Xgboost: A scalable tree boosting system. Proceedings of the 22nd acm sigkdd  
533 international conference on knowledge discovery and data mining. ACM; 2016. pp. 785–94.
- 534 52. Quinlan JR. Induction of decision trees. *Machine Learning*. 1986;1:81–106.
- 535 53. Fan R-E, Chang K-W, Hsieh C-J, Wang X-R, Lin C-J. LIBLINEAR: A library for large linear  
536 classification. *Journal of Machine Learning Research*. 2008;9:1871–4.
- 537 54. Vapnik VN. Statistical learning theory. New York: Wiley; 1998.
- 538 55. Hulten G, Spencer L, Domingos P. Mining time-changing data streams. *ACM SIGKDD Intl Conf On*  
539 *Knowledge Discovery and Data Mining*. ACM Press; 2001. pp. 97–106.
- 540 56. Landwehr N, Hall M, Frank E. Logistic Model Trees. 2005;95:161–205.
- 541 57. Kruskal WH, Wallis WA. Use of ranks in one-criterion variance analysis. *Journal of the American*  
542 *statistical Association*. Taylor & Francis Group; 1952;47:583–621.
- 543 58. Ishwaran H, Kogalur UB, Kogalur MUB. Package “randomForestSRC”. 2019;
- 544 59. Cover TM, Thomas JA. Elements of information theory. John Wiley & Sons; 2012.
- 545 60. Breiman L. Random Forests. *Machine Learning*. 2001;45:5–32.
- 546 61. Guyon I, Weston J, Barnhill S, Vapnik V. Gene selection for cancer classification using support vector  
547 machines. *Machine Learning*. 2002;46:389–422.



- 548 62. Pearson K. VII. Note on regression and inheritance in the case of two parents. proceedings of the royal  
549 society of London. The Royal Society London; 1895;58:240–2.
- 550 63. Holte RC. Very Simple Classification Rules Perform Well on Most Commonly Used Datasets. Machine  
551 Learning. 1993;11:63–90.
- 552 64. Kononenko I. Estimating attributes: Analysis and extensions of RELIEF. In: Bergadano F, De Raedt L,  
553 editors. Machine Learning ECML94. Berlin / Heidelberg: Springer; 1994. pp. 171–82.
- 554 65. Witten IH, Frank E, Hall MA, Pal CJ. Data Mining: Practical machine learning tools and techniques.  
555 Morgan Kaufmann; 2016.
- 556 66. Walt S van der, Colbert SC, Varoquaux G. The NumPy Array: A Structure for Efficient Numerical  
557 Computation. Computing in Science & Engineering. 2011;13:22–30.
- 558 67. Olson RS, La Cava W, Orzechowski P, Urbanowicz RJ, Moore JH. PMLB: A large benchmark suite for  
559 machine learning evaluation and comparison. BioData Mining. 2017;10:36.
- 560 68. Simonoff JS. Analyzing Categorical Data. New York: Springer-Verlag; 2003.
- 561 69. Michalski RS, Mozetic I, Hong J, Lavrac N. The Multi-purpose Incremental Learning System AQ15 and  
562 Its Testing Application to Three Medical Domains. Proceedings of the Fifth AAAI National Conference on  
563 Artificial Intelligence. AAAI Press; 1986. pp. 1041–5.
- 564 70. Güvenir HA, Demiröz G, Ilter N. Learning differential diagnosis of erythematous-squamous diseases using  
565 voting feature intervals. Artificial Intelligence in Medicine. 1998;13:147–65.
- 566 71. Diaconis P, Efron B. Computer-intensive methods in statistics. Scientific American. Scientific American,  
567 a division of Nature America, Inc. 1983;248:116–31.
- 568 72. Fisher RA. The Use of Multiple Measurements in Taxonomic Problems. Annals of Eugenics.  
569 1936;7:179–88.
- 570 73. Robinson D, Allaway SL, Ritchie CD, Smolski OR, Bailey AR. The use of artificial intelligence in the  
571 prediction of alcohol-induced fatty liver. MEDINFO 89: Proceedings of the Sixth Conference on Medical  
572 Informatics, Beijing, China, 16-20 October 1989 and Singapore, Republic of Singapore, 11-15 December  
573 1989. North Holland; 1989. p. 170.
- 574 74. Harley CB, Reynolds RP. Analysis of E. Coli promoter sequences. Nucleic Acids Research.  
575 1987;15:2343–61.

- 576 75. Horton P, Nakai K. A probabilistic classification system for predicting the cellular localization sites of  
577 proteins. Proceedings International Conference on Intelligent Systems for Molecular Biology.  
578 1996;4:109–15.
- 579 76. Sklearn.Preprocessing.RobustScaler scikit-learn 0.21.2 documentation.  
580 <https://scikit-learn.org/stable/modules/generated/sklearn.preprocessing.RobustScaler.html>;
- 581 77. Ho TKT, Hull J, Srihari SNS, Member S. Decision combination in multiple classifier systems. IEEE  
582 Transactions on Pattern Analysis and Machine Intelligence. 1994;16:66–75.
- 583 78. Demsar J, Zupan B, Leban G, Curk T. Orange: From experimental machine learning to interactive data  
584 mining. Knowledge Discovery in Databases: PKDD 2004. Berlin; 2004. pp. 537–9.
- 585 79. Elgohary A, Boehm M, Haas PJ, Reiss FR, Reinwald B. Compressed linear algebra for large-scale  
586 machine learning. Proceedings of the VLDB Endowment. VLDB Endowment; 2016;9:960–71.
- 587 80. Boettiger C. An introduction to Docker for reproducible research. ACM SIGOPS Operating Systems  
588 Review. 2015;49:71–9.
- 589 81. Ho YY, Pepyne D. Simple Explanation of the No-Free-Lunch Theorem and Its Implications. Journal of  
590 Optimization Theory and Applications. 2002;115:549–70.
- 591 82. Xu L, Krzyzak A, Suen C. Methods of combining multiple classifiers and their applications to  
592 handwriting recognition. IEEE Transactions on Systems Man and Cybernetics. 1992;22:418–35.
